# Supplementary material for: Changes in Lactate Production, Lactate Dehydrogenase Genes Expression and DNA Methylation in Response to Tamoxifen Resistance Development in MCF-7 Cell Line
Source: MDPI journal article supplement (doi:10.3390/genes12050777), 2021-05-19

File: B2\_B.ab1 Run Ended: 2018/7/27 21:55:0 Signal G:136 A:367 C:77 T:504  
 Sample: B2\_B Lane: 10 Base spacing: -15.016356 393 bases in 9534 scans Page 1 of 2

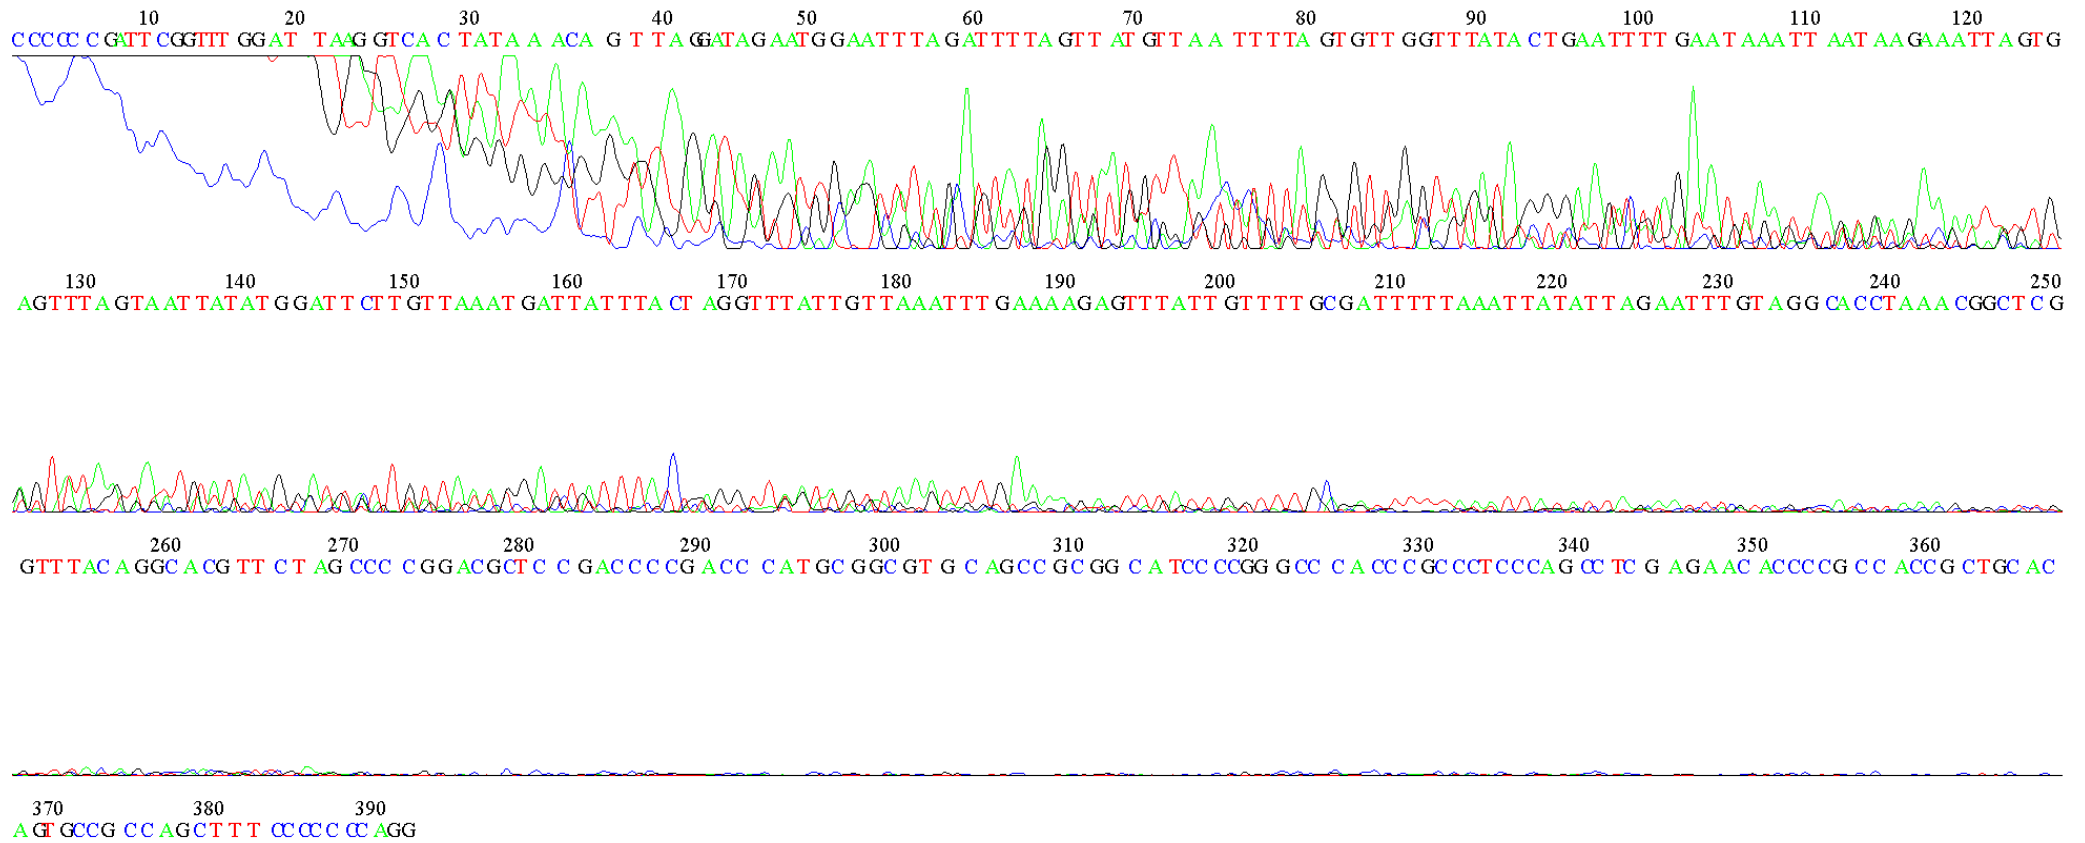

File: B2\_B.ab1      Run Ended: 2018/7/27 21:55:0      Signal G:136 A:367 C:77 T:504  
Sample: B2\_B      Lane: 10      Base spacing: -15.016356      393 bases in 9534 scans      Page 2 of 2

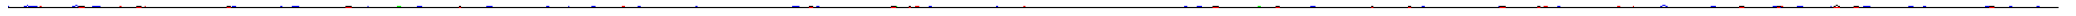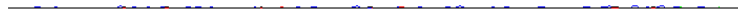

File: B9\_B.ab1 Run Ended: 2018/7/27 21:55:0 Signal G:491 A:624 C:477 T:550  
 Sample: B9\_B Lane: 27 Base spacing: 13.90427 293 bases in 3733 scans Page 1 of 1

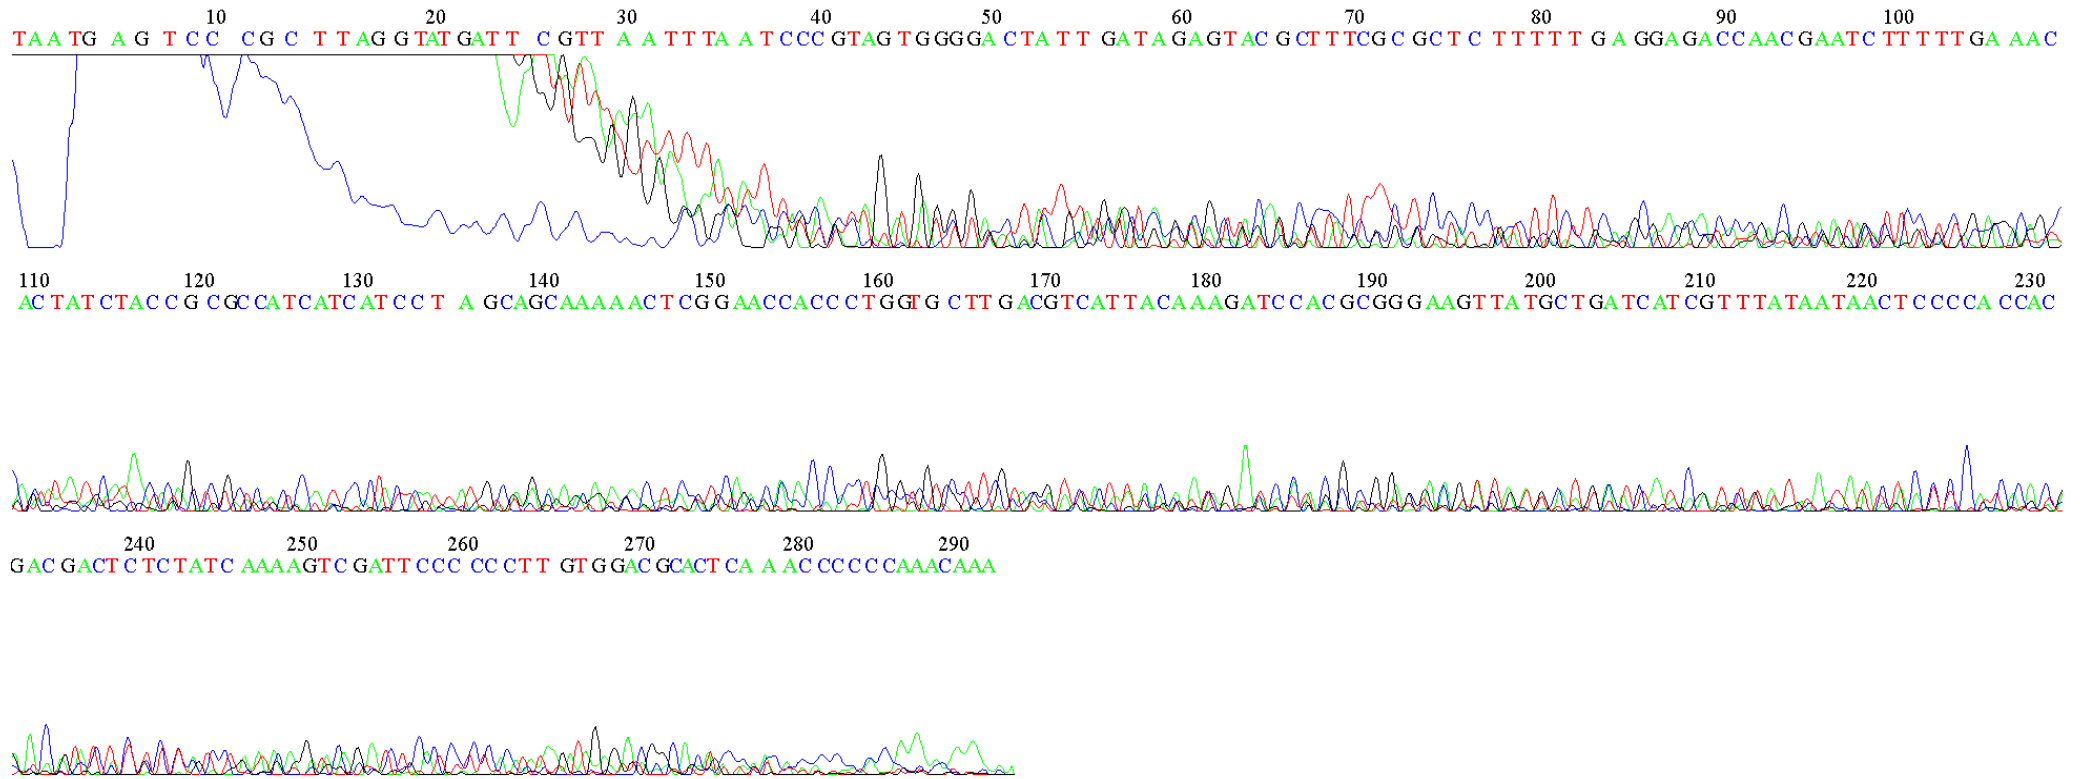

File: B10\_B.ab1 Run Ended: 2018/7/27 21:55:0 Signal G:410 A:497 C:235 T:457  
 Sample: B10\_B Lane: 25 Base spacing: 13.868502 341 bases in 4332 scans Page 1 of 1

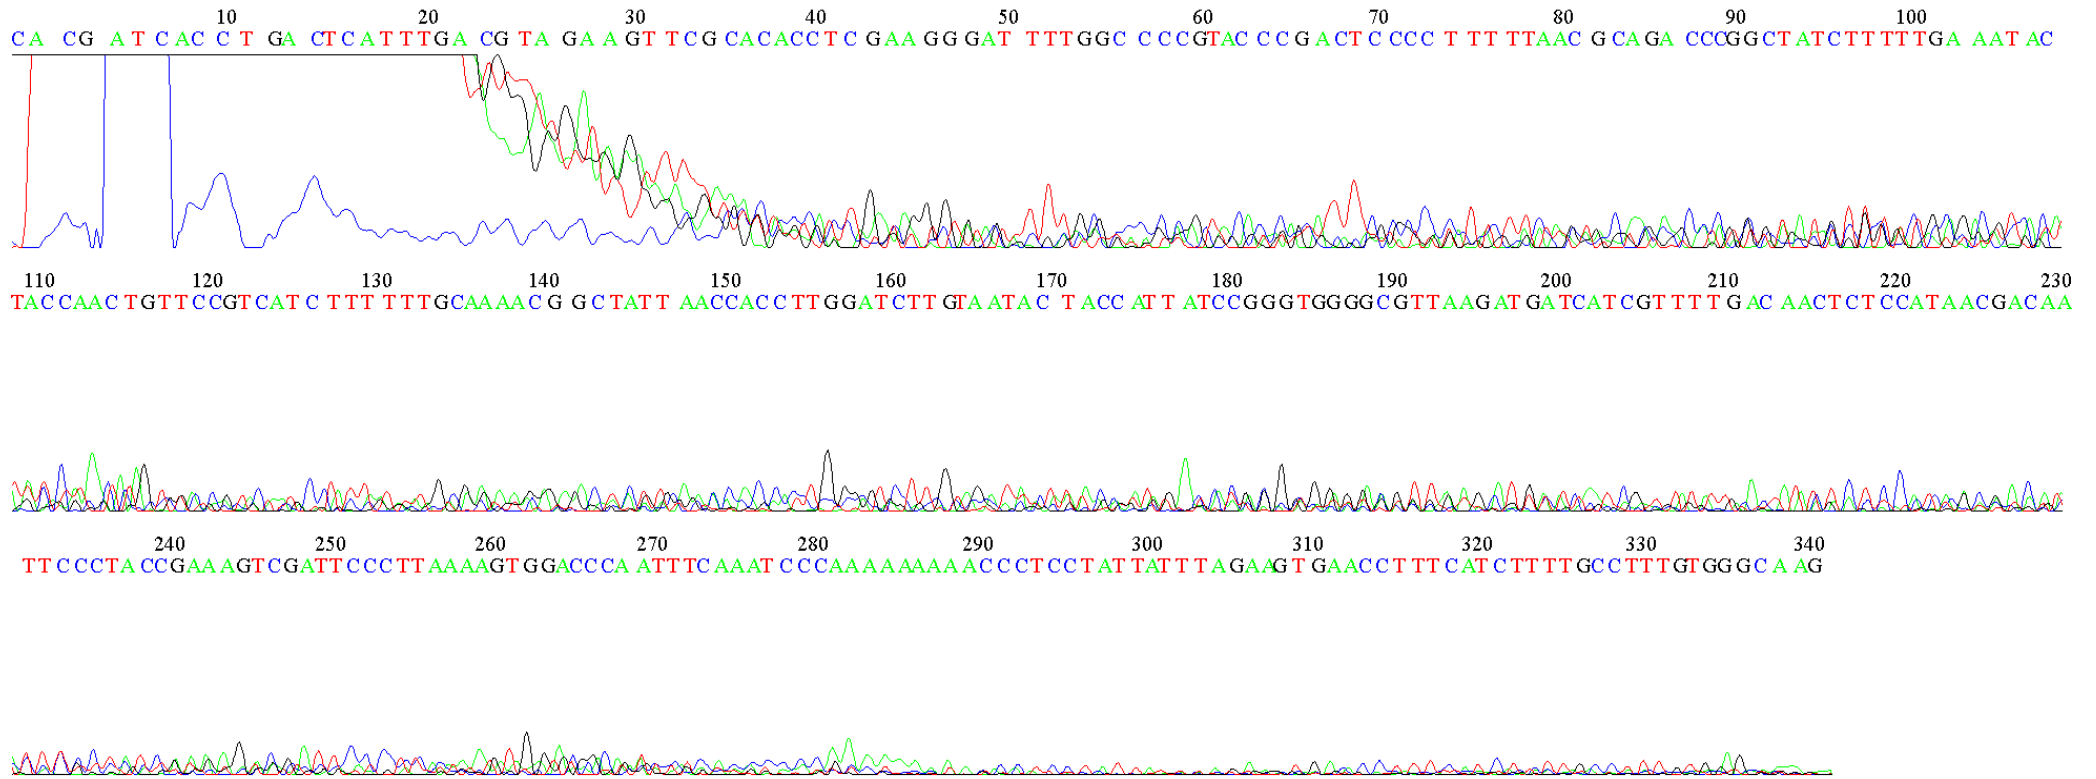

Supplement: s1 [file s1]
